# Supplementary material for: Cerebral organoids with chromosome 21 trisomy secrete Alzheimer’s disease-related soluble aggregates detectable by single-molecule-fluorescence and super-resolution microscopy
Source: Springer Nature journal article supplement (doi:10.1038/s41380-023-02333-3), 2023-12-15

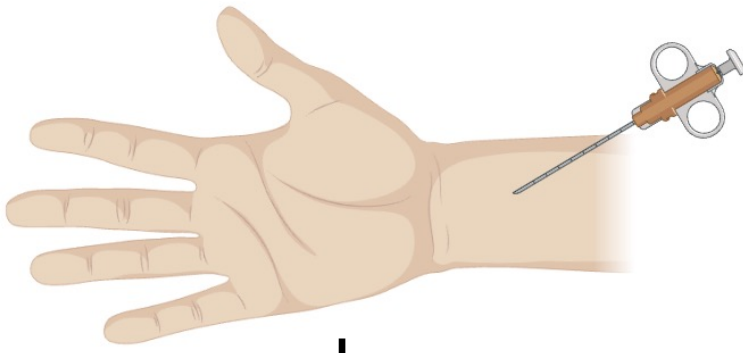

Skin biopsy from from mosaic  
DS individual: cytogenetics  
finds 60% T21, 40% D21

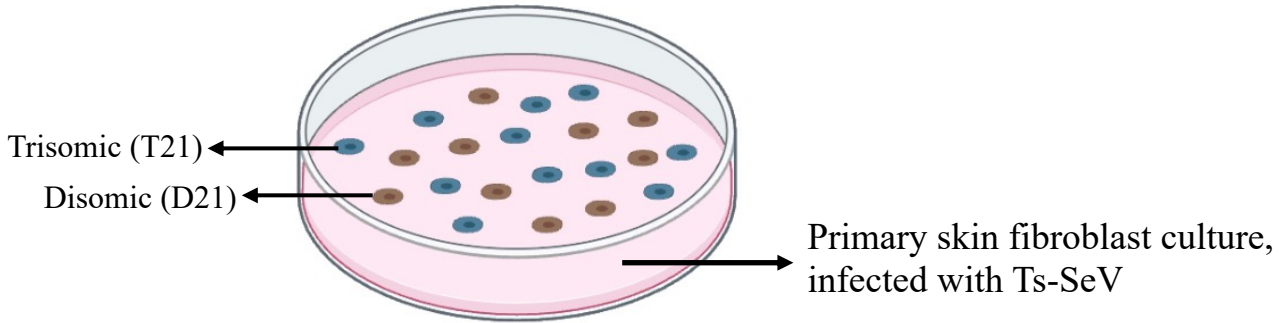

Trisomic (T21)

Disomic (D21)

Primary skin fibroblast culture,  
infected with Ts-SeV

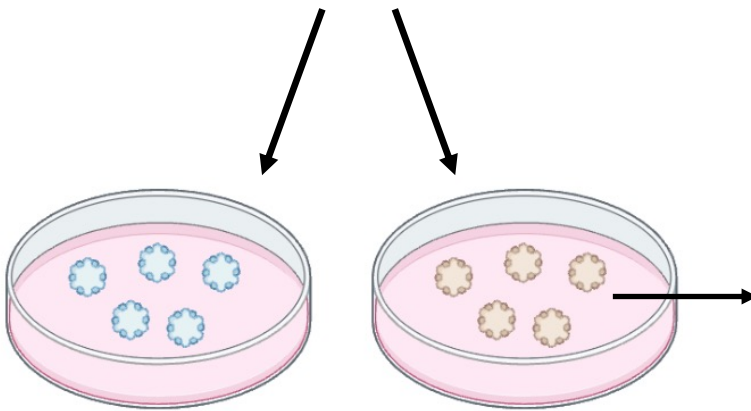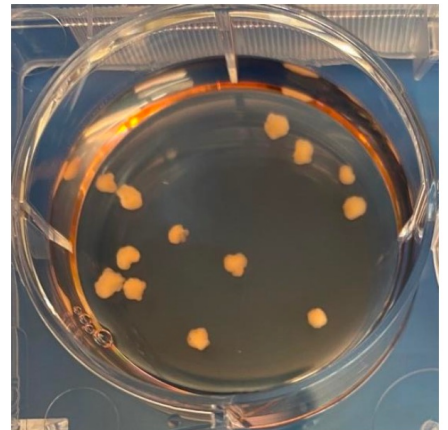

Supplement: 41380_2023_2333_MOESM1_ESM.pdf [file 41380_2023_2333_MOESM1_ESM.pdf]
