# Supplementary material for: Cerebral organoids with chromosome 21 trisomy secrete Alzheimer’s disease-related soluble aggregates detectable by single-molecule-fluorescence and super-resolution microscopy
Source: Springer Nature journal article supplement (doi:10.1038/s41380-023-02333-3), 2023-12-15

**A.**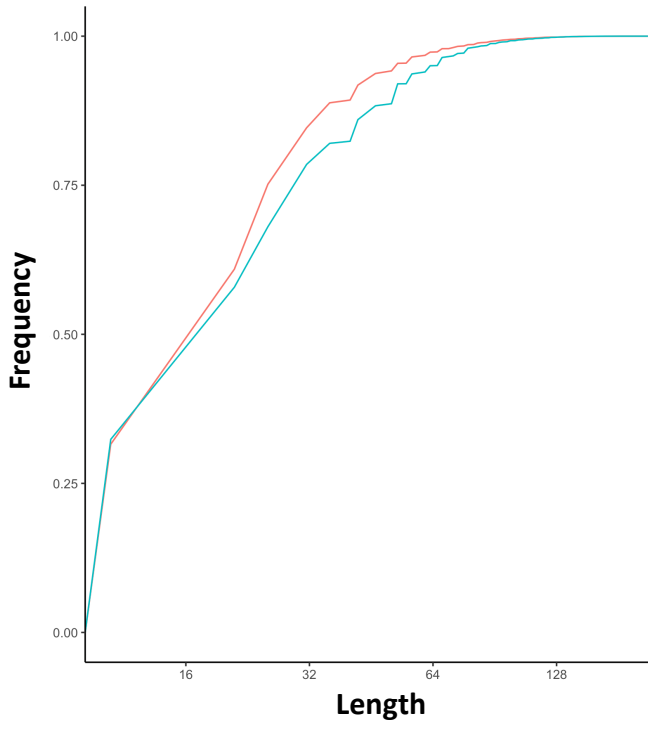**B.**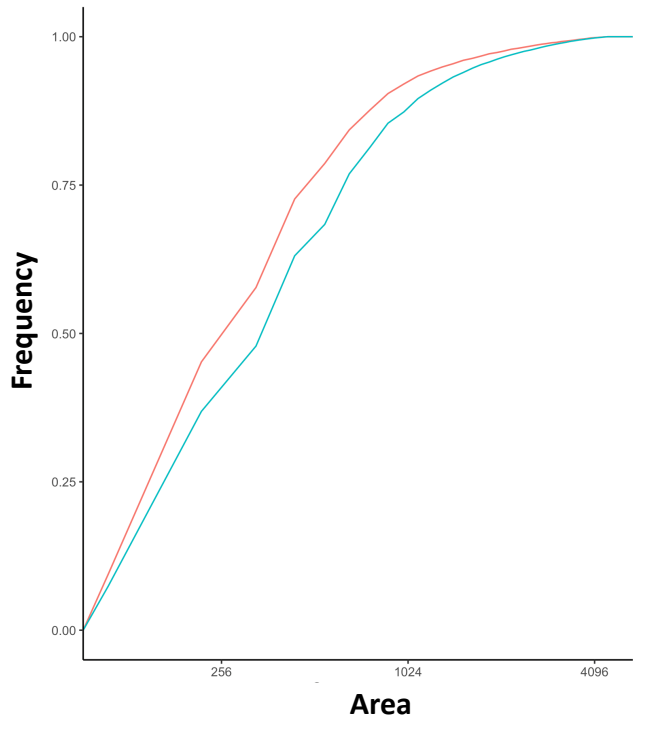**C.**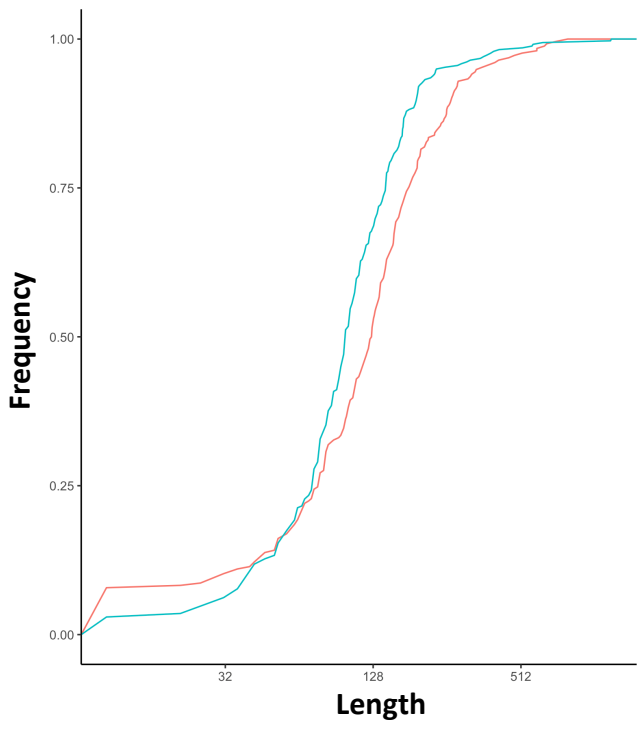**D.**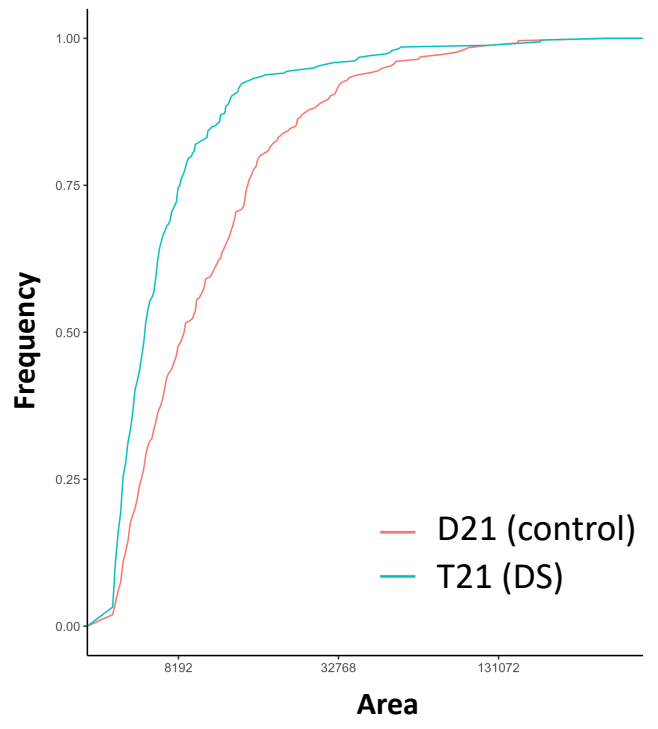

Supplement: 41380_2023_2333_MOESM4_ESM.pdf [file 41380_2023_2333_MOESM4_ESM.pdf]
